# Supplementary material
Source: MDPI journal article supplement (https://www.mdpi.com/2073-4344/11/10/1241)
Supplement: s1 [file s1 › catalysts-1384593-supplementary.pdf]

# Electronic Supplementary Materials

## **Cobalt boride/ g-C<sub>3</sub>N<sub>4</sub> nanosheets-assisted electrocatalytic oxidation of 5-hydroxymethylfurfural into 2,5-Furandicarboxylic acid**

Mohammed A. Suliman<sup>1</sup>, Chanbasha Basheer<sup>1,2,\*</sup> and Wasif Farooq<sup>3</sup>

<sup>1</sup> Department of Chemistry, King Fahd University of Petroleum and Minerals, Dhahran 31261, Saudi Arabia; g201403100@kfupm.edu.sa

<sup>2</sup> Interdisciplinary Research Centre for Membranes and Water Security, King Fahd University of Petroleum and Minerals, Dhahran 31261, Saudi Arabia

<sup>3</sup> Department of Chemical Engineering, King Fahd University of Petroleum and Minerals, Dhahran 31261, Saudi Arabia; wasif@kfupm.edu.sa

\*Correspondence: cbasheer@kfupm.edu.sa; Tel.: +966-13860; Fax: +966-13860-4277

\* Corresponding author: [cbasheer@kfupm.edu.sa](mailto:cbasheer@kfupm.edu.sa)

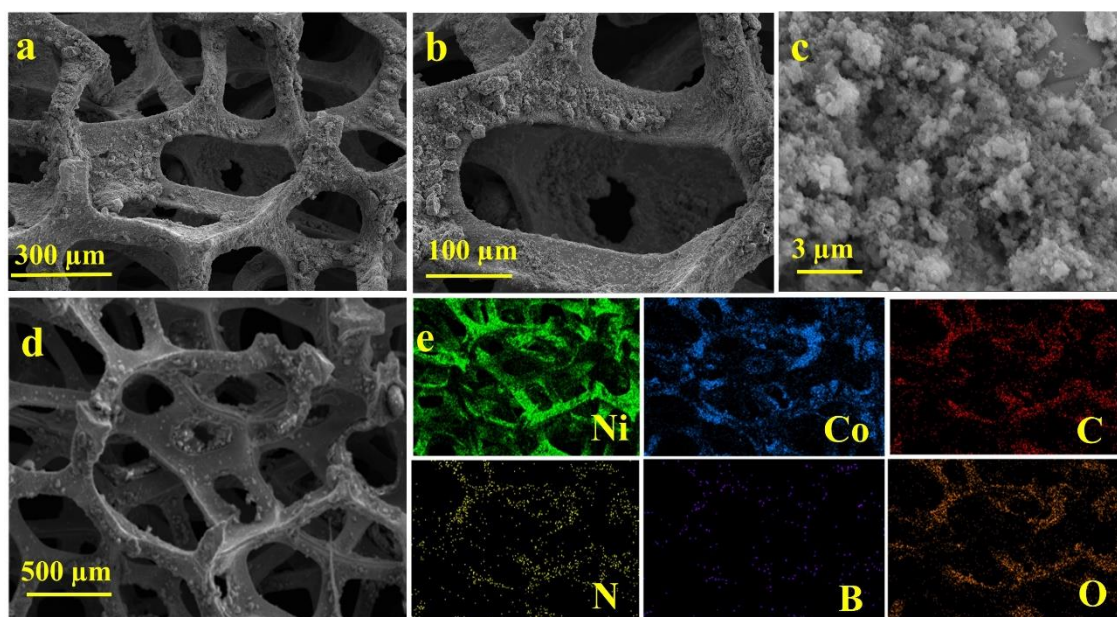

Figure S1 (a-c) SEM picture of post-HMF CoB/g-C<sub>3</sub>N<sub>4</sub>@NiF at various magnifications. (d-e) SEM and the elemental mapping pictures of post-HMF CoB/g-C<sub>3</sub>N<sub>4</sub>/NiF show a uniform distribution of Ni, Co, C, N, and B, as well as substantial amount of oxygen.

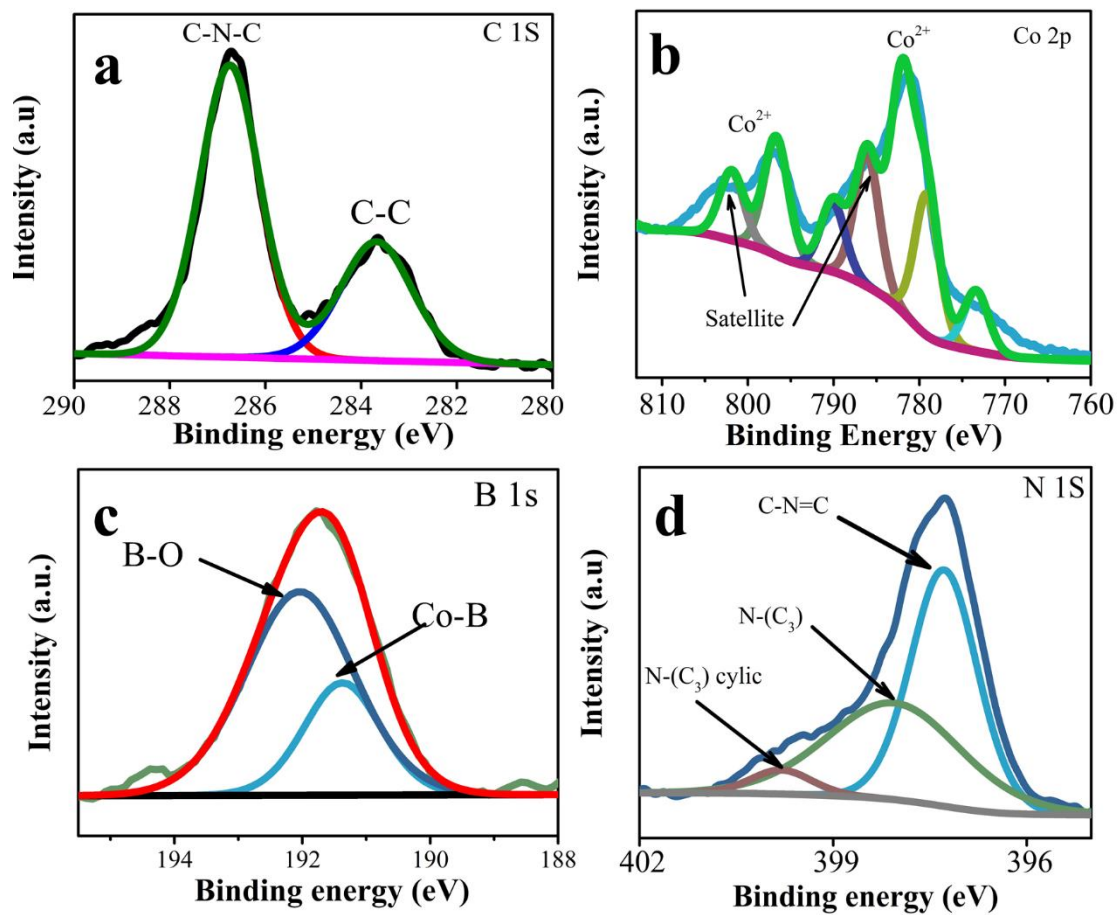

Figure S2: XPS spectra of C 1s, Co 2p, B 1s and N 1s.
